# Supplementary material
Source: publisher site journal article supplement (https://www.dovepress.com/article/456181)
Supplement: Supplementary file 1 [file get_supplementary_file.php]

Supplementary Material

**In vitro antibacterial effect study of plasma-activated saline on Mycobacterium tuberculosis**

Jianbao Zheng1,2*, Zepeng Dong 1*, Xianzhen Jin 1, Jing Li 2, Yuanwu Zou 2, Guanghong Bai 2, Qianhong Wu 2,, Shenghang Xu 3, Zifeng Wang 3, Xuejun Sun 1,, Dingxin Liu 3, Li Guo 3

1 Department of General Surgery, First Affiliated Hospital of Xi’an Jiaotong University, Xi’an 710061, China

2 Tuberculosis Prevention and Treatment Hospital in Shaanxi Province, Xi’an 710100, China

3 Center for Plasma Biomedicine, State Key Laboratory of Electrical Insulation and Power Equipment, Xi’an Jiaotong University, Xi’an 710049, China

*These authors contributed equally to this work

Correspondence: Qianhong Wu, Email: 15902969531@126.com; Li Guo, Email: [guoli35@mail.xjtu.edu.cn](mailto:guoli35@mail.xjtu.edu.cn)

**This file in cludes:** Supplementary tables S1 to S3

**TableS1 The growth of mycobacterium tuberculosis at different time points**

**（growth experiment）**

| Mycobacterium tuberculosis | Group | 14th | 20th | 26th | 31st |
| --- | --- | --- | --- | --- | --- |
| 7281 | NS | - | + | ++ | ++ |
|  | NS | - | + | ++ | ++ |
|  | NS | - | + | ++ | ++ |
|  | PAS | - | - | - | - |
|  | PAS | - | - | - | - |
|  | PAS | - | - | + | ++ |
|  | HCl | - | + | ++ | ++ |
|  | HCl | - | + | ++ | ++ |
|  | HCl | - | + | ++ | ++ |
| 9545 | NS | + | + | ++ | ++ |
|  | NS | + | + | ++ | ++ |
|  | NS | + | + | ++ | ++ |
|  | PAS | - | - | - | - |
|  | PAS | - | - | - | - |
|  | PAS | - | - | - | - |
|  | HCl | - | + | ++ | ++ |
|  | HCl | - | + | ++ | ++ |
|  | HCl | - | + | ++ | ++ |
| H37RV | NS | + | +++ | +++ | +++ |
|  | NS | + | +++ | +++ | +++ |
|  | NS | + | +++ | +++ | +++ |
|  | PAS | - | + | ++ | ++ |
|  | PAS | - | - | + | + |
|  | PAS | - | - | + | + |
|  | HCl | - | + | + | + |
|  | HCl | - | + | ++ | ++ |
|  | HCl | + | + | ++ | ++ |

**TableS2 The growth of mycobacterium tuberculosis at different time points**

**(bacterial suspension concentration = 10-2)**

| Antituberculosis drugs | Mycobacterium tuberculosis | Group | 20th | 26th | 31st |
| --- | --- | --- | --- | --- | --- |
| RIF | 7281 | NS | ++++ | ++++ | ++++ |
|  |  | PAS | + | +++ | ++++ |
|  |  | HCl | +++ | ++++ | ++++ |
|  | 5158 | NS | +++ | ++++ | ++++ |
|  |  | PAS | + | ++ | +++ |
|  |  | HCl | +++ | ++++ | ++++ |
|  | 9545 | NS | +++ | ++++ | ++++ |
|  |  | PAS | + | ++ | ++ |
|  |  | HCl | ++ | ++++ | ++++ |
|  | 7454 | NS | - | - | - |
|  |  | PAS | - | - | - |
|  |  | HCl | - | - | + |
| INH | 7281 | NS | +++ | ++++ | ++++ |
|  |  | PAS | ++ | +++ | ++++ |
|  |  | HCl | +++ | ++++ | ++++ |
|  | 5158 | NS | +++ | ++++ | ++++ |
|  |  | PAS | + | ++ | +++ |
|  |  | HCl | +++ | ++++ | ++++ |
|  | 9545 | NS | +++ | ++++ | ++++ |
|  |  | PAS | + | ++ | ++ |
|  |  | HCl | ++ | ++++ | ++++ |
|  | 7454 | NS | ++++ | ++++ | ++++ |
|  |  | PAS | ++ | +++ | +++ |
|  |  | HCl | +++ | ++++ | ++++ |
| EMB | 7281 | NS | +++ | ++++ | ++++ |
|  |  | PAS | + | ++ | ++ |
|  |  | HCl | ++ | +++ | +++ |
|  | 5158 | NS | ++ | ++++ | ++++ |
|  |  | PAS | + | + | + |
|  |  | HCl | + | ++ | ++ |
|  | 9545 | NS | - | - | - |
|  |  | PAS | - | - | - |
|  |  | HCl | - | - | - |
|  | 7454 | NS | ++ | +++ | +++ |
|  |  | PAS | - | + | + |
|  |  | HCl | - | ++ | ++ |
| SM | 7281 | NS | ++ | +++ | ++++ |
|  |  | PAS | + | ++ | ++ |
|  |  | HCl | ++++ | ++++ | ++++ |
|  | 5158 | NS | +++ | ++++ | ++++ |
|  |  | PAS | + | ++ | +++ |
|  |  | HCl | +++ | ++++ | ++++ |
|  | 9545 | NS | +++ | ++++ | ++++ |
|  |  | PAS | ++ | ++ | ++ |
|  |  | HCl | +++ | ++++ | ++++ |
|  | 7454 | NS | ++++ | ++++ | ++++ |
|  |  | PAS | ++ | ++ | ++ |
|  |  | HCl | ++++ | ++++ | ++++ |

**TableS3 The growth of mycobacterium tuberculosis at different time points**

**(bacterial suspension concentration = 10-4)**

| Antituberculosis drugs | Mycobacterium tuberculosis | Group | 20th | 26th | 31st |
| --- | --- | --- | --- | --- | --- |
| RIF | 7281 | NS | + | + | + |
|  |  | PAS | - | - | + |
|  |  | HCl | + | + | + |
|  | 5158 | NS | - | - | + |
|  |  | PAS | - | - | - |
|  |  | HCl | - | - | + |
|  | 9545 | NS | - | + | + |
|  |  | PAS | - | - | - |
|  |  | HCl | - | - | - |
|  | 7454 | NS | - | - | - |
|  |  | PAS | - | - | - |
|  |  | HCl | - | - | - |
| INH | 7281 | NS | - | + | + |
|  |  | PAS | - | + | + |
|  |  | HCl | - | + | + |
|  | 5158 | NS | - | + | + |
|  |  | PAS | - | - | + |
|  |  | HCl | - | - | - |
|  | 9545 | NS | - | + | + |
|  |  | PAS | - | - | - |
|  |  | HCl | - | - | - |
|  | 7454 | NS | + | ++ | ++ |
|  |  | PAS | - | - | - |
|  |  | HCl | - | + | ++ |
| EMB | 7281 | NS | - | - | - |
|  |  | PAS | - | - | - |
|  |  | HCl | - | - | - |
|  | 5158 | NS | - | - | - |
|  |  | PAS | - | - | - |
|  |  | HCl | - | - | - |
|  | 9545 | NS | - | - | - |
|  |  | PAS | - | - | - |
|  |  | HCl | - | - | - |
|  | 7454 | NS | - | - | - |
|  |  | PAS | - | - | - |
|  |  | HCl | - | - | - |
| SM | 7281 | NS | - | - | + |
|  |  | PAS | - | - | - |
|  |  | HCl | - | - | + |
|  | 5158 | NS | - | - | + |
|  |  | PAS | - | - | - |
|  |  | HCl | - | - | - |
|  | 9545 | NS | - | + | + |
|  |  | PAS | - | - | - |
|  |  | HCl | - | - | - |
|  | 7454 | NS | + | + | + |
|  |  | PAS | - | - | - |
|  |  | HCl | - | - | - |
